# Supplementary material for: Molecular modeling and structural characterization of a high glycine–tyrosine hair keratin associated protein
Source: Royal Society of Chemistry journal article supplement (doi:10.1039/c6cp06772g), 2017-01-01
Supplement: c6cp06772g1.pdf [file c6cp06772g1.pdf]

**PDB file of KAP8.1 Model**

```
REMARK      Accelrys Discovery Studio PDB file
REMARK      Created: 2016-07-01T15:14:01Z
SSBOND      1 CYS A      1      CYS A      28
SSBOND      2 CYS A     13      CYS A     43
ATOM        1  N      MET A    -1          27.440  17.934  11.835  1.00  0.00
N1+
ATOM        2  HT1   MET A    -1          27.384  18.772  12.446  1.00  0.00
H
ATOM        3  HT2   MET A    -1          28.365  17.475  11.936  1.00  0.00
H
ATOM        4  HT3   MET A    -1          26.717  17.236  12.139  1.00  0.00
H
ATOM        5  CA     MET A    -1          27.128  18.212  10.432  1.00  0.00
C
ATOM        6  HA     MET A    -1          26.559  19.143  10.391  1.00  0.00
H
ATOM        7  CB     MET A    -1          28.350  18.270   9.493  1.00  0.00
C
ATOM        8  HB1   MET A    -1          29.077  17.497   9.747  1.00  0.00
H
ATOM        9  HB2   MET A    -1          28.041  18.058   8.467  1.00  0.00
H
ATOM       10  CG     MET A    -1          29.020  19.648   9.471  1.00  0.00
C
ATOM       11  HG1   MET A    -1          28.276  20.420   9.270  1.00  0.00
H
ATOM       12  HG2   MET A    -1          29.478  19.862  10.437  1.00  0.00
H
ATOM       13  SD     MET A    -1          30.292  19.698   8.194  1.00  0.00
S
ATOM       14  CE     MET A    -1          29.813  21.223   7.360  1.00  0.00
C
ATOM       15  HE1   MET A    -1          30.570  21.513   6.630  1.00  0.00
H
ATOM       16  HE2   MET A    -1          29.713  22.029   8.088  1.00  0.00
H
ATOM       17  HE3   MET A    -1          28.848  21.100   6.865  1.00  0.00
H
ATOM       18  C      MET A    -1          26.167  17.100  10.050  1.00  0.00
C
ATOM       19  O      MET A    -1          25.973  16.228  10.887  1.00  0.00
O
ATOM       20  N      LEU A     0          25.577  17.246   8.844  1.00  0.00
N
ATOM       21  HN     LEU A     0          25.973  17.949   8.252  1.00  0.00
H
ATOM       22  CA     LEU A     0          24.200  16.840   8.482  1.00  0.00
C
ATOM       23  HA     LEU A     0          24.212  16.663   7.407  1.00  0.00
H
ATOM       24  CB     LEU A     0          23.629  15.615   9.238  1.00  0.00
C
ATOM       25  HB1   LEU A     0          23.763  15.734  10.315  1.00  0.00
H
ATOM       26  HB2   LEU A     0          22.549  15.557   9.112  1.00  0.00
H
```

|           |    |      |     |   |   |        |        |        |      |      |
|-----------|----|------|-----|---|---|--------|--------|--------|------|------|
| ATOM<br>C | 27 | CG   | LEU | A | 0 | 24.188 | 14.265 | 8.765  | 1.00 | 0.00 |
| ATOM<br>H | 28 | HG   | LEU | A | 0 | 25.269 | 14.352 | 8.652  | 1.00 | 0.00 |
| ATOM<br>C | 29 | CD1  | LEU | A | 0 | 23.932 | 13.186 | 9.822  | 1.00 | 0.00 |
| ATOM<br>H | 30 | 1HD1 | LEU | A | 0 | 24.258 | 12.205 | 9.478  | 1.00 | 0.00 |
| ATOM<br>H | 31 | 2HD1 | LEU | A | 0 | 22.875 | 13.108 | 10.074 | 1.00 | 0.00 |
| ATOM<br>H | 32 | 3HD1 | LEU | A | 0 | 24.471 | 13.411 | 10.742 | 1.00 | 0.00 |
| ATOM<br>C | 33 | CD2  | LEU | A | 0 | 23.576 | 13.841 | 7.420  | 1.00 | 0.00 |
| ATOM<br>H | 34 | 1HD2 | LEU | A | 0 | 23.985 | 12.880 | 7.101  | 1.00 | 0.00 |
| ATOM<br>H | 35 | 2HD2 | LEU | A | 0 | 23.789 | 14.562 | 6.631  | 1.00 | 0.00 |
| ATOM<br>H | 36 | 3HD2 | LEU | A | 0 | 22.491 | 13.728 | 7.488  | 1.00 | 0.00 |
| ATOM<br>C | 37 | C    | LEU | A | 0 | 23.374 | 18.109 | 8.728  | 1.00 | 0.00 |
| ATOM<br>O | 38 | O    | LEU | A | 0 | 23.998 | 19.155 | 8.908  | 1.00 | 0.00 |
| ATOM<br>N | 39 | N    | CYS | A | 1 | 22.034 | 17.996 | 8.789  | 1.00 | 0.00 |
| ATOM<br>H | 40 | HN   | CYS | A | 1 | 21.538 | 17.167 | 8.525  | 1.00 | 0.00 |
| ATOM<br>C | 41 | CA   | CYS | A | 1 | 21.277 | 19.061 | 9.420  | 1.00 | 0.00 |
| ATOM<br>H | 42 | HA   | CYS | A | 1 | 21.905 | 19.542 | 10.176 | 1.00 | 0.00 |
| ATOM<br>C | 43 | CB   | CYS | A | 1 | 20.820 | 20.113 | 8.404  | 1.00 | 0.00 |
| ATOM<br>H | 44 | HB1  | CYS | A | 1 | 19.777 | 20.387 | 8.574  | 1.00 | 0.00 |
| ATOM<br>H | 45 | HB2  | CYS | A | 1 | 21.406 | 21.022 | 8.535  | 1.00 | 0.00 |
| ATOM<br>S | 46 | SG   | CYS | A | 1 | 21.021 | 19.567 | 6.699  | 1.00 | 0.00 |
| ATOM<br>C | 47 | C    | CYS | A | 1 | 20.138 | 18.363 | 10.144 | 1.00 | 0.00 |
| ATOM<br>O | 48 | O    | CYS | A | 1 | 19.100 | 18.000 | 9.578  | 1.00 | 0.00 |
| ATOM<br>N | 49 | N    | ASP | A | 2 | 20.428 | 18.155 | 11.438 | 1.00 | 0.00 |
| ATOM<br>H | 50 | HN   | ASP | A | 2 | 21.322 | 18.406 | 11.821 | 1.00 | 0.00 |
| ATOM<br>C | 51 | CA   | ASP | A | 2 | 19.490 | 17.554 | 12.374 | 1.00 | 0.00 |
| ATOM<br>H | 52 | HA   | ASP | A | 2 | 19.068 | 16.678 | 11.877 | 1.00 | 0.00 |
| ATOM<br>C | 53 | CB   | ASP | A | 2 | 20.220 | 17.098 | 13.659 | 1.00 | 0.00 |
| ATOM<br>H | 54 | HB1  | ASP | A | 2 | 20.035 | 17.808 | 14.469 | 1.00 | 0.00 |
| ATOM<br>H | 55 | HB2  | ASP | A | 2 | 19.805 | 16.150 | 14.006 | 1.00 | 0.00 |







|           |     |     |     |   |    |        |        |        |      |      |
|-----------|-----|-----|-----|---|----|--------|--------|--------|------|------|
| ATOM<br>H | 143 | HN  | PHE | A | 9  | 5.071  | 22.758 | 22.715 | 1.00 | 0.00 |
| ATOM<br>C | 144 | CA  | PHE | A | 9  | 3.551  | 24.207 | 23.028 | 1.00 | 0.00 |
| ATOM<br>H | 145 | HA  | PHE | A | 9  | 3.334  | 25.177 | 22.576 | 1.00 | 0.00 |
| ATOM<br>C | 146 | CB  | PHE | A | 9  | 2.480  | 23.130 | 22.726 | 1.00 | 0.00 |
| ATOM<br>H | 147 | HB1 | PHE | A | 9  | 2.618  | 22.753 | 21.713 | 1.00 | 0.00 |
| ATOM<br>H | 148 | HB2 | PHE | A | 9  | 2.602  | 22.292 | 23.402 | 1.00 | 0.00 |
| ATOM<br>C | 149 | CG  | PHE | A | 9  | 1.052  | 23.569 | 22.871 | 1.00 | 0.00 |
| ATOM<br>C | 150 | CD1 | PHE | A | 9  | 0.333  | 24.021 | 21.771 | 1.00 | 0.00 |
| ATOM<br>H | 151 | HD1 | PHE | A | 9  | 0.799  | 24.079 | 20.794 | 1.00 | 0.00 |
| ATOM<br>C | 152 | CD2 | PHE | A | 9  | 0.423  | 23.511 | 24.111 | 1.00 | 0.00 |
| ATOM<br>H | 153 | HD2 | PHE | A | 9  | 0.950  | 23.103 | 24.962 | 1.00 | 0.00 |
| ATOM<br>C | 154 | CE1 | PHE | A | 9  | -0.992 | 24.410 | 21.919 | 1.00 | 0.00 |
| ATOM<br>H | 155 | HE1 | PHE | A | 9  | -1.550 | 24.773 | 21.067 | 1.00 | 0.00 |
| ATOM<br>C | 156 | CE2 | PHE | A | 9  | -0.890 | 23.932 | 24.265 | 1.00 | 0.00 |
| ATOM<br>H | 157 | HE2 | PHE | A | 9  | -1.373 | 23.913 | 25.235 | 1.00 | 0.00 |
| ATOM<br>C | 158 | CZ  | PHE | A | 9  | -1.600 | 24.374 | 23.165 | 1.00 | 0.00 |
| ATOM<br>H | 159 | HZ  | PHE | A | 9  | -2.623 | 24.705 | 23.291 | 1.00 | 0.00 |
| ATOM<br>C | 160 | C   | PHE | A | 9  | 3.823  | 24.307 | 24.533 | 1.00 | 0.00 |
| ATOM<br>O | 161 | O   | PHE | A | 9  | 4.635  | 23.537 | 25.050 | 1.00 | 0.00 |
| ATOM<br>N | 162 | N   | PRO | A | 10 | 3.122  | 25.215 | 25.273 | 1.00 | 0.00 |
| ATOM<br>C | 163 | CD  | PRO | A | 10 | 2.287  | 26.304 | 24.759 | 1.00 | 0.00 |
| ATOM<br>H | 164 | HD1 | PRO | A | 10 | 2.933  | 27.077 | 24.345 | 1.00 | 0.00 |
| ATOM<br>H | 165 | HD2 | PRO | A | 10 | 1.595  | 25.986 | 23.981 | 1.00 | 0.00 |
| ATOM<br>C | 166 | CA  | PRO | A | 10 | 3.160  | 25.146 | 26.736 | 1.00 | 0.00 |
| ATOM<br>H | 167 | HA  | PRO | A | 10 | 4.186  | 25.075 | 27.104 | 1.00 | 0.00 |
| ATOM<br>C | 168 | CB  | PRO | A | 10 | 2.510  | 26.482 | 27.152 | 1.00 | 0.00 |
| ATOM<br>H | 169 | HB1 | PRO | A | 10 | 2.046  | 26.527 | 28.138 | 1.00 | 0.00 |
| ATOM<br>H | 170 | HB2 | PRO | A | 10 | 3.297  | 27.238 | 27.169 | 1.00 | 0.00 |
| ATOM<br>C | 171 | CG  | PRO | A | 10 | 1.558  | 26.823 | 26.005 | 1.00 | 0.00 |







|           |     |     |     |   |    |        |        |        |      |      |
|-----------|-----|-----|-----|---|----|--------|--------|--------|------|------|
| ATOM<br>C | 230 | CA  | GLY | A | 16 | -1.870 | 20.546 | 24.466 | 1.00 | 0.00 |
| ATOM<br>H | 231 | HA1 | GLY | A | 16 | -2.854 | 20.089 | 24.354 | 1.00 | 0.00 |
| ATOM<br>H | 232 | HA2 | GLY | A | 16 | -2.006 | 21.619 | 24.389 | 1.00 | 0.00 |
| ATOM<br>C | 233 | C   | GLY | A | 16 | -0.931 | 20.047 | 23.363 | 1.00 | 0.00 |
| ATOM<br>O | 234 | O   | GLY | A | 16 | 0.262  | 19.825 | 23.538 | 1.00 | 0.00 |
| ATOM<br>N | 235 | N   | SER | A | 17 | -1.558 | 19.868 | 22.174 | 1.00 | 0.00 |
| ATOM<br>H | 236 | HN  | SER | A | 17 | -2.471 | 20.261 | 22.029 | 1.00 | 0.00 |
| ATOM<br>C | 237 | CA  | SER | A | 17 | -0.841 | 19.162 | 21.086 | 1.00 | 0.00 |
| ATOM<br>H | 238 | HA  | SER | A | 17 | -0.633 | 18.163 | 21.475 | 1.00 | 0.00 |
| ATOM<br>C | 239 | CB  | SER | A | 17 | -1.767 | 19.058 | 19.844 | 1.00 | 0.00 |
| ATOM<br>H | 240 | HB1 | SER | A | 17 | -2.773 | 18.783 | 20.161 | 1.00 | 0.00 |
| ATOM<br>H | 241 | HB2 | SER | A | 17 | -1.874 | 20.053 | 19.417 | 1.00 | 0.00 |
| ATOM<br>O | 242 | OG  | SER | A | 17 | -1.414 | 18.143 | 18.801 | 1.00 | 0.00 |
| ATOM<br>H | 243 | HG  | SER | A | 17 | -0.466 | 17.923 | 18.857 | 1.00 | 0.00 |
| ATOM<br>C | 244 | C   | SER | A | 17 | 0.504  | 19.861 | 20.691 | 1.00 | 0.00 |
| ATOM<br>O | 245 | O   | SER | A | 17 | 0.516  | 21.014 | 20.252 | 1.00 | 0.00 |
| ATOM<br>N | 246 | N   | TYR | A | 18 | 1.599  | 19.060 | 20.819 | 1.00 | 0.00 |
| ATOM<br>H | 247 | HN  | TYR | A | 18 | 1.470  | 18.144 | 21.202 | 1.00 | 0.00 |
| ATOM<br>C | 248 | CA  | TYR | A | 18 | 2.959  | 19.485 | 20.477 | 1.00 | 0.00 |
| ATOM<br>H | 249 | HA  | TYR | A | 18 | 3.078  | 20.522 | 20.793 | 1.00 | 0.00 |
| ATOM<br>C | 250 | CB  | TYR | A | 18 | 3.995  | 18.519 | 21.115 | 1.00 | 0.00 |
| ATOM<br>H | 251 | HB1 | TYR | A | 18 | 3.560  | 17.530 | 21.275 | 1.00 | 0.00 |
| ATOM<br>H | 252 | HB2 | TYR | A | 18 | 4.832  | 18.355 | 20.434 | 1.00 | 0.00 |
| ATOM<br>C | 253 | CG  | TYR | A | 18 | 4.583  | 19.014 | 22.415 | 1.00 | 0.00 |
| ATOM<br>C | 254 | CD1 | TYR | A | 18 | 3.979  | 20.028 | 23.135 | 1.00 | 0.00 |
| ATOM<br>H | 255 | HD1 | TYR | A | 18 | 3.015  | 20.383 | 22.820 | 1.00 | 0.00 |
| ATOM<br>C | 256 | CE1 | TYR | A | 18 | 4.557  | 20.540 | 24.279 | 1.00 | 0.00 |
| ATOM<br>H | 257 | HE1 | TYR | A | 18 | 4.024  | 21.302 | 24.823 | 1.00 | 0.00 |
| ATOM<br>C | 258 | CD2 | TYR | A | 18 | 5.759  | 18.475 | 22.921 | 1.00 | 0.00 |



|           |     |     |     |   |    |        |        |        |      |      |
|-----------|-----|-----|-----|---|----|--------|--------|--------|------|------|
| ATOM<br>C | 288 | CE2 | TYR | A | 20 | 3.202  | 23.238 | 11.870 | 1.00 | 0.00 |
| ATOM<br>H | 289 | HE2 | TYR | A | 20 | 2.348  | 23.827 | 12.169 | 1.00 | 0.00 |
| ATOM<br>C | 290 | CZ  | TYR | A | 20 | 4.074  | 23.702 | 10.886 | 1.00 | 0.00 |
| ATOM<br>O | 291 | OH  | TYR | A | 20 | 3.858  | 24.888 | 10.180 | 1.00 | 0.00 |
| ATOM<br>H | 292 | HH  | TYR | A | 20 | 2.960  | 25.232 | 10.131 | 1.00 | 0.00 |
| ATOM<br>C | 293 | C   | TYR | A | 20 | 7.025  | 19.911 | 13.684 | 1.00 | 0.00 |
| ATOM<br>O | 294 | O   | TYR | A | 20 | 7.462  | 21.062 | 13.611 | 1.00 | 0.00 |
| ATOM<br>N | 295 | N   | PRO | A | 21 | 7.765  | 18.797 | 13.376 | 1.00 | 0.00 |
| ATOM<br>C | 296 | CD  | PRO | A | 21 | 7.337  | 17.395 | 13.467 | 1.00 | 0.00 |
| ATOM<br>H | 297 | HD1 | PRO | A | 21 | 7.332  | 17.086 | 14.514 | 1.00 | 0.00 |
| ATOM<br>H | 298 | HD2 | PRO | A | 21 | 6.349  | 17.241 | 13.034 | 1.00 | 0.00 |
| ATOM<br>C | 299 | CA  | PRO | A | 21 | 9.049  | 18.935 | 12.727 | 1.00 | 0.00 |
| ATOM<br>H | 300 | HA  | PRO | A | 21 | 9.680  | 19.594 | 13.303 | 1.00 | 0.00 |
| ATOM<br>C | 301 | CB  | PRO | A | 21 | 9.592  | 17.517 | 12.562 | 1.00 | 0.00 |
| ATOM<br>H | 302 | HB1 | PRO | A | 21 | 10.261 | 17.313 | 13.388 | 1.00 | 0.00 |
| ATOM<br>H | 303 | HB2 | PRO | A | 21 | 10.163 | 17.355 | 11.643 | 1.00 | 0.00 |
| ATOM<br>C | 304 | CG  | PRO | A | 21 | 8.374  | 16.605 | 12.659 | 1.00 | 0.00 |
| ATOM<br>H | 305 | HG1 | PRO | A | 21 | 7.999  | 16.388 | 11.658 | 1.00 | 0.00 |
| ATOM<br>H | 306 | HG2 | PRO | A | 21 | 8.634  | 15.659 | 13.126 | 1.00 | 0.00 |
| ATOM<br>C | 307 | C   | PRO | A | 21 | 8.747  | 19.517 | 11.371 | 1.00 | 0.00 |
| ATOM<br>O | 308 | O   | PRO | A | 21 | 7.679  | 19.219 | 10.822 | 1.00 | 0.00 |
| ATOM<br>N | 309 | N   | LEU | A | 22 | 9.687  | 20.348 | 10.898 | 1.00 | 0.00 |
| ATOM<br>H | 310 | HN  | LEU | A | 22 | 10.516 | 20.540 | 11.431 | 1.00 | 0.00 |
| ATOM<br>C | 311 | CA  | LEU | A | 22 | 9.595  | 20.772 | 9.519  | 1.00 | 0.00 |
| ATOM<br>H | 312 | HA  | LEU | A | 22 | 8.560  | 21.049 | 9.313  | 1.00 | 0.00 |
| ATOM<br>C | 313 | CB  | LEU | A | 22 | 10.519 | 21.979 | 9.249  | 1.00 | 0.00 |
| ATOM<br>H | 314 | HB1 | LEU | A | 22 | 10.362 | 22.337 | 8.229  | 1.00 | 0.00 |
| ATOM<br>H | 315 | HB2 | LEU | A | 22 | 11.562 | 21.659 | 9.294  | 1.00 | 0.00 |
| ATOM<br>C | 316 | CG  | LEU | A | 22 | 10.315 | 23.157 | 10.220 | 1.00 | 0.00 |







|           |     |     |     |   |    |        |        |        |      |      |
|-----------|-----|-----|-----|---|----|--------|--------|--------|------|------|
| ATOM<br>H | 404 | HA2 | GLY | A | 29 | 17.543 | 14.488 | 9.369  | 1.00 | 0.00 |
| ATOM<br>C | 405 | C   | GLY | A | 29 | 15.581 | 14.845 | 8.593  | 1.00 | 0.00 |
| ATOM<br>O | 406 | O   | GLY | A | 29 | 14.999 | 15.927 | 8.691  | 1.00 | 0.00 |
| ATOM<br>N | 407 | N   | TYR | A | 30 | 14.946 | 13.654 | 8.708  | 1.00 | 0.00 |
| ATOM<br>H | 408 | HN  | TYR | A | 30 | 15.507 | 12.868 | 8.424  | 1.00 | 0.00 |
| ATOM<br>C | 409 | CA  | TYR | A | 30 | 13.588 | 13.666 | 9.212  | 1.00 | 0.00 |
| ATOM<br>H | 410 | HA  | TYR | A | 30 | 13.093 | 14.392 | 8.569  | 1.00 | 0.00 |
| ATOM<br>C | 411 | CB  | TYR | A | 30 | 12.814 | 12.352 | 8.984  | 1.00 | 0.00 |
| ATOM<br>H | 412 | HB1 | TYR | A | 30 | 12.773 | 12.192 | 7.915  | 1.00 | 0.00 |
| ATOM<br>H | 413 | HB2 | TYR | A | 30 | 11.783 | 12.461 | 9.319  | 1.00 | 0.00 |
| ATOM<br>C | 414 | CG  | TYR | A | 30 | 13.362 | 11.080 | 9.568  | 1.00 | 0.00 |
| ATOM<br>C | 415 | CD1 | TYR | A | 30 | 12.879 | 10.614 | 10.781 | 1.00 | 0.00 |
| ATOM<br>H | 416 | HD1 | TYR | A | 30 | 12.184 | 11.234 | 11.309 | 1.00 | 0.00 |
| ATOM<br>C | 417 | CE1 | TYR | A | 30 | 13.283 | 9.388  | 11.284 | 1.00 | 0.00 |
| ATOM<br>H | 418 | HE1 | TYR | A | 30 | 12.882 | 9.007  | 12.216 | 1.00 | 0.00 |
| ATOM<br>C | 419 | CD2 | TYR | A | 30 | 14.299 | 10.315 | 8.882  | 1.00 | 0.00 |
| ATOM<br>H | 420 | HD2 | TYR | A | 30 | 14.722 | 10.655 | 7.948  | 1.00 | 0.00 |
| ATOM<br>C | 421 | CE2 | TYR | A | 30 | 14.722 | 9.096  | 9.383  | 1.00 | 0.00 |
| ATOM<br>H | 422 | HE2 | TYR | A | 30 | 15.456 | 8.521  | 8.831  | 1.00 | 0.00 |
| ATOM<br>C | 423 | CZ  | TYR | A | 30 | 14.206 | 8.629  | 10.580 | 1.00 | 0.00 |
| ATOM<br>O | 424 | OH  | TYR | A | 30 | 14.607 | 7.422  | 11.098 | 1.00 | 0.00 |
| ATOM<br>H | 425 | HH  | TYR | A | 30 | 15.064 | 7.657  | 11.906 | 1.00 | 0.00 |
| ATOM<br>C | 426 | C   | TYR | A | 30 | 13.574 | 14.243 | 10.645 | 1.00 | 0.00 |
| ATOM<br>O | 427 | O   | TYR | A | 30 | 13.981 | 13.638 | 11.637 | 1.00 | 0.00 |
| ATOM<br>N | 428 | N   | GLY | A | 31 | 13.097 | 15.503 | 10.693 | 1.00 | 0.00 |
| ATOM<br>H | 429 | HN  | GLY | A | 31 | 13.261 | 15.933 | 9.802  | 1.00 | 0.00 |
| ATOM<br>C | 430 | CA  | GLY | A | 31 | 12.975 | 16.167 | 11.987 | 1.00 | 0.00 |
| ATOM<br>H | 431 | HA1 | GLY | A | 31 | 13.978 | 16.239 | 12.417 | 1.00 | 0.00 |
| ATOM<br>H | 432 | HA2 | GLY | A | 31 | 12.581 | 17.167 | 11.809 | 1.00 | 0.00 |

|           |     |      |     |   |    |        |        |        |      |      |
|-----------|-----|------|-----|---|----|--------|--------|--------|------|------|
| ATOM<br>C | 433 | C    | GLY | A | 31 | 12.027 | 15.385 | 12.912 | 1.00 | 0.00 |
| ATOM<br>O | 434 | O    | GLY | A | 31 | 11.132 | 14.661 | 12.459 | 1.00 | 0.00 |
| ATOM<br>N | 435 | N    | SER | A | 32 | 12.210 | 15.583 | 14.234 | 1.00 | 0.00 |
| ATOM<br>H | 436 | HN   | SER | A | 32 | 12.910 | 16.257 | 14.456 | 1.00 | 0.00 |
| ATOM<br>C | 437 | CA   | SER | A | 32 | 11.550 | 14.769 | 15.258 | 1.00 | 0.00 |
| ATOM<br>H | 438 | HA   | SER | A | 32 | 11.396 | 13.796 | 14.810 | 1.00 | 0.00 |
| ATOM<br>C | 439 | CB   | SER | A | 32 | 12.428 | 14.590 | 16.517 | 1.00 | 0.00 |
| ATOM<br>H | 440 | HB1  | SER | A | 32 | 13.310 | 14.006 | 16.232 | 1.00 | 0.00 |
| ATOM<br>H | 441 | HB2  | SER | A | 32 | 12.818 | 15.549 | 16.879 | 1.00 | 0.00 |
| ATOM<br>O | 442 | OG   | SER | A | 32 | 11.751 | 13.861 | 17.550 | 1.00 | 0.00 |
| ATOM<br>H | 443 | HG   | SER | A | 32 | 11.379 | 14.418 | 18.249 | 1.00 | 0.00 |
| ATOM<br>C | 444 | C    | SER | A | 32 | 10.165 | 15.278 | 15.652 | 1.00 | 0.00 |
| ATOM<br>O | 445 | O    | SER | A | 32 | 9.757  | 16.429 | 15.512 | 1.00 | 0.00 |
| ATOM<br>N | 446 | N    | THR | A | 33 | 9.419  | 14.313 | 16.238 | 1.00 | 0.00 |
| ATOM<br>H | 447 | HN   | THR | A | 33 | 9.923  | 13.496 | 16.534 | 1.00 | 0.00 |
| ATOM<br>C | 448 | CA   | THR | A | 33 | 8.152  | 14.624 | 16.901 | 1.00 | 0.00 |
| ATOM<br>H | 449 | HA   | THR | A | 33 | 7.658  | 15.413 | 16.334 | 1.00 | 0.00 |
| ATOM<br>C | 450 | CB   | THR | A | 33 | 7.293  | 13.330 | 16.876 | 1.00 | 0.00 |
| ATOM<br>H | 451 | HB   | THR | A | 33 | 7.668  | 12.765 | 16.024 | 1.00 | 0.00 |
| ATOM<br>O | 452 | OG1  | THR | A | 33 | 5.933  | 13.623 | 16.571 | 1.00 | 0.00 |
| ATOM<br>H | 453 | HG1  | THR | A | 33 | 5.397  | 12.826 | 16.635 | 1.00 | 0.00 |
| ATOM<br>C | 454 | CG2  | THR | A | 33 | 7.458  | 12.409 | 18.101 | 1.00 | 0.00 |
| ATOM<br>H | 455 | 1HG2 | THR | A | 33 | 8.512  | 12.297 | 18.360 | 1.00 | 0.00 |
| ATOM<br>H | 456 | 2HG2 | THR | A | 33 | 6.935  | 12.783 | 18.981 | 1.00 | 0.00 |
| ATOM<br>H | 457 | 3HG2 | THR | A | 33 | 7.083  | 11.407 | 17.896 | 1.00 | 0.00 |
| ATOM<br>C | 458 | C    | THR | A | 33 | 8.570  | 15.176 | 18.286 | 1.00 | 0.00 |
| ATOM<br>O | 459 | O    | THR | A | 33 | 9.764  | 15.418 | 18.487 | 1.00 | 0.00 |
| ATOM<br>N | 460 | N    | TYR | A | 34 | 7.610  | 15.310 | 19.217 | 1.00 | 0.00 |
| ATOM<br>H | 461 | HN   | TYR | A | 34 | 6.642  | 15.095 | 19.068 | 1.00 | 0.00 |















|           |     |     |     |   |    |       |        |        |      |      |
|-----------|-----|-----|-----|---|----|-------|--------|--------|------|------|
| ATOM<br>C | 636 | C   | GLY | A | 47 | 1.051 | 13.857 | 21.687 | 1.00 | 0.00 |
| ATOM<br>O | 637 | O   | GLY | A | 47 | 1.175 | 15.085 | 21.675 | 1.00 | 0.00 |
| ATOM<br>N | 638 | N   | TYR | A | 48 | 1.711 | 13.001 | 20.881 | 1.00 | 0.00 |
| ATOM<br>H | 639 | HN  | TYR | A | 48 | 1.547 | 12.019 | 20.863 | 1.00 | 0.00 |
| ATOM<br>C | 640 | CA  | TYR | A | 48 | 2.732 | 13.479 | 19.954 | 1.00 | 0.00 |
| ATOM<br>H | 641 | HA  | TYR | A | 48 | 3.108 | 14.445 | 20.303 | 1.00 | 0.00 |
| ATOM<br>C | 642 | CB  | TYR | A | 48 | 3.891 | 12.461 | 19.914 | 1.00 | 0.00 |
| ATOM<br>H | 643 | HB1 | TYR | A | 48 | 4.588 | 12.676 | 19.106 | 1.00 | 0.00 |
| ATOM<br>H | 644 | HB2 | TYR | A | 48 | 4.470 | 12.570 | 20.831 | 1.00 | 0.00 |
| ATOM<br>C | 645 | CG  | TYR | A | 48 | 3.442 | 11.023 | 19.825 | 1.00 | 0.00 |
| ATOM<br>C | 646 | CD1 | TYR | A | 48 | 2.804 | 10.528 | 18.690 | 1.00 | 0.00 |
| ATOM<br>H | 647 | HD1 | TYR | A | 48 | 2.604 | 11.163 | 17.846 | 1.00 | 0.00 |
| ATOM<br>C | 648 | CE1 | TYR | A | 48 | 2.382 | 9.210  | 18.624 | 1.00 | 0.00 |
| ATOM<br>H | 649 | HE1 | TYR | A | 48 | 1.899 | 8.829  | 17.734 | 1.00 | 0.00 |
| ATOM<br>C | 650 | CD2 | TYR | A | 48 | 3.655 | 10.166 | 20.901 | 1.00 | 0.00 |
| ATOM<br>H | 651 | HD2 | TYR | A | 48 | 4.142 | 10.509 | 21.804 | 1.00 | 0.00 |
| ATOM<br>C | 652 | CE2 | TYR | A | 48 | 3.225 | 8.848  | 20.844 | 1.00 | 0.00 |
| ATOM<br>H | 653 | HE2 | TYR | A | 48 | 3.387 | 8.194  | 21.684 | 1.00 | 0.00 |
| ATOM<br>C | 654 | CZ  | TYR | A | 48 | 2.584 | 8.375  | 19.711 | 1.00 | 0.00 |
| ATOM<br>O | 655 | OH  | TYR | A | 48 | 2.147 | 7.071  | 19.668 | 1.00 | 0.00 |
| ATOM<br>H | 656 | HH  | TYR | A | 48 | 2.640 | 6.610  | 18.990 | 1.00 | 0.00 |
| ATOM<br>C | 657 | C   | TYR | A | 48 | 2.086 | 13.683 | 18.579 | 1.00 | 0.00 |
| ATOM<br>O | 658 | O   | TYR | A | 48 | 0.922 | 13.310 | 18.373 | 1.00 | 0.00 |
| ATOM<br>N | 659 | N   | ARG | A | 49 | 2.937 | 14.273 | 17.695 | 1.00 | 0.00 |
| ATOM<br>H | 660 | HN  | ARG | A | 49 | 3.885 | 14.463 | 17.965 | 1.00 | 0.00 |
| ATOM<br>C | 661 | CA  | ARG | A | 49 | 2.580 | 14.476 | 16.302 | 1.00 | 0.00 |
| ATOM<br>H | 662 | HA  | ARG | A | 49 | 1.524 | 14.224 | 16.195 | 1.00 | 0.00 |
| ATOM<br>C | 663 | CB  | ARG | A | 49 | 2.784 | 15.976 | 15.951 | 1.00 | 0.00 |
| ATOM<br>H | 664 | HB1 | ARG | A | 49 | 2.668 | 16.573 | 16.857 | 1.00 | 0.00 |







|           |     |     |     |   |    |        |        |        |      |      |
|-----------|-----|-----|-----|---|----|--------|--------|--------|------|------|
| ATOM<br>C | 723 | CZ  | TYR | A | 51 | 11.219 | 10.875 | 16.501 | 1.00 | 0.00 |
| ATOM<br>O | 724 | OH  | TYR | A | 51 | 11.883 | 10.766 | 17.716 | 1.00 | 0.00 |
| ATOM<br>H | 725 | HH  | TYR | A | 51 | 11.313 | 10.703 | 18.495 | 1.00 | 0.00 |
| ATOM<br>C | 726 | C   | TYR | A | 51 | 8.094  | 13.362 | 11.267 | 1.00 | 0.00 |
| ATOM<br>O | 727 | O   | TYR | A | 51 | 6.909  | 13.660 | 11.063 | 1.00 | 0.00 |
| ATOM<br>N | 728 | N   | SER | A | 52 | 9.126  | 13.552 | 10.408 | 1.00 | 0.00 |
| ATOM<br>H | 729 | HN  | SER | A | 52 | 10.049 | 13.193 | 10.590 | 1.00 | 0.00 |
| ATOM<br>C | 730 | CA  | SER | A | 52 | 8.979  | 14.042 | 9.035  | 1.00 | 0.00 |
| ATOM<br>H | 731 | HA  | SER | A | 52 | 8.017  | 14.550 | 8.940  | 1.00 | 0.00 |
| ATOM<br>C | 732 | CB  | SER | A | 52 | 10.175 | 15.005 | 8.770  | 1.00 | 0.00 |
| ATOM<br>H | 733 | HB1 | SER | A | 52 | 10.024 | 15.914 | 9.361  | 1.00 | 0.00 |
| ATOM<br>H | 734 | HB2 | SER | A | 52 | 11.047 | 14.511 | 9.201  | 1.00 | 0.00 |
| ATOM<br>O | 735 | OG  | SER | A | 52 | 10.441 | 15.418 | 7.420  | 1.00 | 0.00 |
| ATOM<br>H | 736 | HG  | SER | A | 52 | 11.374 | 15.659 | 7.303  | 1.00 | 0.00 |
| ATOM<br>C | 737 | C   | SER | A | 52 | 8.998  | 12.782 | 8.144  | 1.00 | 0.00 |
| ATOM<br>O | 738 | O   | SER | A | 52 | 9.191  | 11.653 | 8.618  | 1.00 | 0.00 |
| ATOM<br>N | 739 | N   | PRO | A | 53 | 8.771  | 12.977 | 6.814  | 1.00 | 0.00 |
| ATOM<br>C | 740 | CD  | PRO | A | 53 | 7.982  | 14.066 | 6.239  | 1.00 | 0.00 |
| ATOM<br>H | 741 | HD1 | PRO | A | 53 | 8.558  | 14.990 | 6.211  | 1.00 | 0.00 |
| ATOM<br>H | 742 | HD2 | PRO | A | 53 | 7.071  | 14.242 | 6.806  | 1.00 | 0.00 |
| ATOM<br>C | 743 | CA  | PRO | A | 53 | 9.331  | 12.082 | 5.805  | 1.00 | 0.00 |
| ATOM<br>H | 744 | HA  | PRO | A | 53 | 8.950  | 11.071 | 5.955  | 1.00 | 0.00 |
| ATOM<br>C | 745 | CB  | PRO | A | 53 | 8.845  | 12.659 | 4.464  | 1.00 | 0.00 |
| ATOM<br>H | 746 | HB1 | PRO | A | 53 | 8.573  | 11.879 | 3.750  | 1.00 | 0.00 |
| ATOM<br>H | 747 | HB2 | PRO | A | 53 | 9.624  | 13.263 | 4.003  | 1.00 | 0.00 |
| ATOM<br>C | 748 | CG  | PRO | A | 53 | 7.673  | 13.576 | 4.822  | 1.00 | 0.00 |
| ATOM<br>H | 749 | HG1 | PRO | A | 53 | 7.529  | 14.394 | 4.115  | 1.00 | 0.00 |
| ATOM<br>H | 750 | HG2 | PRO | A | 53 | 6.760  | 12.981 | 4.834  | 1.00 | 0.00 |
| ATOM<br>C | 751 | C   | PRO | A | 53 | 10.870 | 12.085 | 5.886  | 1.00 | 0.00 |



|           |     |      |     |   |    |        |        |        |      |      |
|-----------|-----|------|-----|---|----|--------|--------|--------|------|------|
| ATOM<br>C | 781 | C    | ALA | A | 55 | 15.383 | 12.048 | 1.493  | 1.00 | 0.00 |
| ATOM<br>O | 782 | O    | ALA | A | 55 | 15.691 | 12.543 | 0.412  | 1.00 | 0.00 |
| ATOM<br>N | 783 | N    | LEU | A | 56 | 15.595 | 10.767 | 1.833  | 1.00 | 0.00 |
| ATOM<br>H | 784 | HN   | LEU | A | 56 | 15.056 | 10.415 | 2.596  | 1.00 | 0.00 |
| ATOM<br>C | 785 | CA   | LEU | A | 56 | 16.723 | 9.939  | 1.414  | 1.00 | 0.00 |
| ATOM<br>H | 786 | HA   | LEU | A | 56 | 16.296 | 8.959  | 1.220  | 1.00 | 0.00 |
| ATOM<br>C | 787 | CB   | LEU | A | 56 | 17.514 | 10.394 | 0.163  | 1.00 | 0.00 |
| ATOM<br>H | 788 | HB1  | LEU | A | 56 | 17.848 | 11.423 | 0.298  | 1.00 | 0.00 |
| ATOM<br>H | 789 | HB2  | LEU | A | 56 | 18.432 | 9.809  | 0.078  | 1.00 | 0.00 |
| ATOM<br>C | 790 | CG   | LEU | A | 56 | 16.731 | 10.242 | -1.156 | 1.00 | 0.00 |
| ATOM<br>H | 791 | HG   | LEU | A | 56 | 15.709 | 10.589 | -0.996 | 1.00 | 0.00 |
| ATOM<br>C | 792 | CD1  | LEU | A | 56 | 17.340 | 11.124 | -2.253 | 1.00 | 0.00 |
| ATOM<br>H | 793 | 1HD1 | LEU | A | 56 | 17.354 | 12.172 | -1.954 | 1.00 | 0.00 |
| ATOM<br>H | 794 | 2HD1 | LEU | A | 56 | 18.363 | 10.823 | -2.485 | 1.00 | 0.00 |
| ATOM<br>H | 795 | 3HD1 | LEU | A | 56 | 16.762 | 11.057 | -3.174 | 1.00 | 0.00 |
| ATOM<br>C | 796 | CD2  | LEU | A | 56 | 16.664 | 8.778  | -1.620 | 1.00 | 0.00 |
| ATOM<br>H | 797 | 1HD2 | LEU | A | 56 | 16.160 | 8.141  | -0.893 | 1.00 | 0.00 |
| ATOM<br>H | 798 | 2HD2 | LEU | A | 56 | 17.656 | 8.361  | -1.800 | 1.00 | 0.00 |
| ATOM<br>H | 799 | 3HD2 | LEU | A | 56 | 16.105 | 8.695  | -2.553 | 1.00 | 0.00 |
| ATOM<br>C | 800 | C    | LEU | A | 56 | 17.656 | 9.786  | 2.626  | 1.00 | 0.00 |
| ATOM<br>O | 801 | O    | LEU | A | 56 | 18.488 | 8.883  | 2.646  | 1.00 | 0.00 |
| ATOM<br>N | 802 | N    | TYR | A | 57 | 17.449 | 10.678 | 3.623  | 1.00 | 0.00 |
| ATOM<br>H | 803 | HN   | TYR | A | 57 | 16.724 | 11.365 | 3.614  | 1.00 | 0.00 |
| ATOM<br>C | 804 | CA   | TYR | A | 57 | 18.082 | 10.521 | 4.919  | 1.00 | 0.00 |
| ATOM<br>H | 805 | HA   | TYR | A | 57 | 18.519 | 9.521  | 4.974  | 1.00 | 0.00 |
| ATOM<br>C | 806 | CB   | TYR | A | 57 | 19.167 | 11.590 | 5.114  | 1.00 | 0.00 |
| ATOM<br>H | 807 | HB1  | TYR | A | 57 | 19.741 | 11.712 | 4.196  | 1.00 | 0.00 |
| ATOM<br>H | 808 | HB2  | TYR | A | 57 | 18.723 | 12.560 | 5.352  | 1.00 | 0.00 |
| ATOM<br>C | 809 | CG   | TYR | A | 57 | 20.092 | 11.153 | 6.213  | 1.00 | 0.00 |
